# Supplementary material
Source: Springer Nature journal article supplement (https://www.springermedizin.de/resource/supplementary/12939_2012_371_MOESM2_ESM.pdf/9551004)
Supplement: MOESM2 [file 9551004]

## **Additional file 2**

Disadvantaged populations and mean targeting ratio, by type and category of intervention

|                                  | Average                                             | n  | BME <sup>a</sup>       | Children               | Retired households    | Socio-economic disadvantage |
|----------------------------------|-----------------------------------------------------|----|------------------------|------------------------|-----------------------|-----------------------------|
| <i>Type</i>                      |                                                     |    |                        |                        |                       |                             |
| Advice/information               | 1.06 [12] <sup>b</sup><br>(0.73, 1.38) <sup>c</sup> | 3  | 1.20<br>(0.02, 2.37)   | 0.61**<br>(0.54, 0.69) | 1.65*<br>(1.26, 2.03) | 0.77<br>(0.57, 0.97)        |
| Cafe/food co-ops                 | 1.06 [24]<br>(0.84, 1.27)                           | 6  | 1.50<br>(0.69, 2.30)   | 0.77<br>(0.53, 1.01)   | 1.03<br>(0.80, 1.26)  | 0.93<br>(0.59, 1.27)        |
| Facilities for cycling/walking   | 1.12* [80]<br>(1.02, 1.22)                          | 20 | 1.12<br>(0.86, 1.38)   | 1.01<br>(0.91, 1.11)   | 1.23<br>(0.96, 1.50)  | 1.13<br>(0.96, 1.29)        |
| Food growing                     | 0.97 [132]<br>(0.91, 1.02)                          | 33 | 0.64**<br>(0.53, 0.75) | 1.06<br>(1.00, 1.12)   | 1.00<br>(0.90, 1.10)  | 1.17**<br>(1.06, 1.29)      |
| Green gym/dance studio           | 1.02 [40]<br>(0.90, 1.15)                           | 10 | 0.78<br>(0.44, 1.12)   | 1.01<br>(0.89, 1.12)   | 1.18<br>(0.90, 1.45)  | 1.13<br>(0.86, 1.40)        |
| Outdoor play area/green space    | 1.33* [196]<br>(1.05, 1.60)                         | 49 | 2.03<br>(0.93, 3.12)   | 1.05<br>(0.98, 1.13)   | 1.02<br>(0.92, 1.11)  | 1.21**<br>(1.08, 1.34)      |
| Walking/cycling routes           | 1.02 [80]<br>(0.93, 1.10)                           | 20 | 1.07<br>(0.79, 1.35)   | 0.98<br>(0.92, 1.04)   | 1.05<br>(0.93, 1.18)  | 0.98<br>(0.79, 1.16)        |
| Walking/cycling mapping/ signage | 1.33** [168]<br>(1.12, 1.55)                        | 42 | 1.94*<br>(1.11, 2.78)  | 1.09*<br>(1.02, 1.17)  | 1.05<br>(0.92, 1.19)  | 1.25**<br>(1.09, 1.41)      |
| <i>Category</i>                  |                                                     |    |                        |                        |                       |                             |
| Active travel                    | 1.23** [236]<br>(1.11, 1.34)                        | 59 | 1.54*<br>(1.11, 1.97)  | 1.06*<br>(1.00, 1.12)  | 1.12<br>(1.00, 1.24)  | 1.19**<br>(1.06, 1.31)      |
| Food systems                     | 0.98 [156]<br>(0.92, 1.04)                          | 39 | 0.77**<br>(0.61, 0.94) | 1.01<br>(0.95, 1.08)   | 1.00<br>(0.92, 1.09)  | 1.13*<br>(1.03, 1.24)       |
| Healthy lifestyle                | 1.03 [20]<br>(0.82, 1.24)                           | 5  | 1.08<br>(0.53, 1.64)   | 0.71*<br>(0.45, 0.97)  | 1.49<br>(1.02, 1.97)  | 0.84<br>(0.60, 1.09)        |
| Physical activity                | 1.25** [320]<br>(1.06, 1.43)                        | 80 | 1.74*<br>(1.00, 2.49)  | 1.04<br>(0.99, 1.09)   | 1.04<br>(0.96, 1.11)  | 1.17**<br>(1.07, 1.27)      |

Notes: <sup>a</sup>BME: Black and minority ethnic; <sup>b</sup>[n]; <sup>c</sup>(CIs 95% upper, lower); \* $p < 0.05$ , \*\*  $p < 0.01$  values from Student's t-tests comparing mean ratio with a ratio of 1
